# Supplementary material for: Are Congenital Cervical Block Vertebrae a Risk Factor for Adjacent Segment Disease? A Retrospective Cross-Sectional CT and MR Imaging Study
Source: MDPI journal article supplement (doi:10.3390/diagnostics12010090), 2021-12-31
Supplement: s1 [file s1]

## **Supplementary Table S1:**

### **Brückl classification (Brückl, 1979):**

- I. Hypoplasia of intervertebral disk. Arches and spinous process remain free (1 Point)
- II. Hypoplasia of intervertebral disk. Fusion of arches (Spinous process fused or free) (2 Points)
- III. Partial fusion of vertebral bodies (with/or without residual disk) (3 Points)
  - a. Arches and spinous process remain free
  - b. Arches fused, spinous process remains free
  - c. *One arch fused, one arch remains free*
- IV. Complete fusion of vertebral bodies (with or without residual disk). Arches and spinous processes fused (4 Points).
